# Supplementary material for: Regulation of human glioma cell migration, tumor growth, and stemness gene expression using a Lck targeted inhibitor
Source: PubMed Central journal article supplement (PMC6462869; doi:10.1038/s41388-018-0546-z), 2018-10-23
Supplement: 41388_2018_546_MOESM2_ESM.pdf [file 41388_2018_546_MOESM2_ESM.pdf]

**Nanog-targeted genes inhibited by Lck-I in vivo**

BMP7  
DPYSL3  
FGF2  
GJA1  
TNC  
THBS2  
ZEB2  
OBSL1  
ICMT  
PIPOX  
C12orf35  
H2AFJ  
LRRN1  
FAM33A  
ACADM  
ADAR  
ANXA1  
ASAH1  
B2M  
CALD1  
CAV1  
CDK6  
CFL1  
VCAN  
DCX  
EIF4G2  
FAT  
FDPS  
GOLGA4  
H2AFZ  
HSPA5  
CYR61  
PEX1  
PRCP  
PSMB1  
PTN  
PTPN1  
RBM4  
RPLP1  
SEPP1  
SGK

ZNF217  
ZNF226  
PICALM  
NOLC1  
EPM2AIP1  
ACOT8  
PDPN  
SERINC3  
WDR6  
DNAJC16  
METTL7A  
POLR1A  
CLIC4  
BSCL2  
GOLIM4  
HSD17B12  
LARP7  
TMEM66  
CYB5B  
DCTN5  
HIST3H2A  
TMEM123  
ZNF664  
ZNRF2  
KLF15  
NFI  
ACSBG1  
EPHA7  
FGF1  
HIST1H1E  
SLC15A2  
ZNF224  
HIST1H4D  
CALCRL  
OS9  
ACCN4  
LMO3  
GRAMD3  
ZNF436  
CD99L2  
ZNF484  
C6orf204
