# Supplementary material for: Regulation of human glioma cell migration, tumor growth, and stemness gene expression using a Lck targeted inhibitor
Source: PubMed Central journal article supplement (PMC6462869; doi:10.1038/s41388-018-0546-z), 2018-10-23
Supplement: 41388_2018_546_MOESM3_ESM.pdf [file 41388_2018_546_MOESM3_ESM.pdf]

Genes that appear in both

Primary Concept:

Associated Concept:

Interaction

Symbol

ACADM

ANXA1

ASAH1

B2M

CLIC4

EIF4G2

FGF1

FGF2

GJA1

H2AFZ

LARP7

METTL7A

PICALM

PRCP

PTN

SEPP1

THBS2

TMEM123

TNC

VCAN

ZEB2

ZNF217

Nanog target genes

Glioblastoma vs. Normal - Top 10% Over-expressed (TCGA Brain)

P-value: 1.10E-6 Q-value: 0.003 Odds Ratio: 4.0 Size: 22 genes

Gene Name

acyl-CoA dehydrogenase, C-4 to C-12 straight chain

annexin A1

N-acylsphingosine amidohydrolase (acid ceramidase) 1

beta-2-microglobulin

chloride intracellular channel 4

eukaryotic translation initiation factor 4 gamma, 2

fibroblast growth factor 1 (acidic)

fibroblast growth factor 2 (basic)

gap junction protein, alpha 1, 43kDa

H2A histone family, member Z

La ribonucleoprotein domain family, member 7

methyltransferase like 7A

phosphatidylinositol binding clathrin assembly protein

prolylcarboxypeptidase (angiotensinase C)

pleiotrophin

selenoprotein P, plasma, 1

thrombospondin 2

transmembrane protein 123

tenascin C

versican

zinc finger E-box binding homeobox 2

zinc finger protein 217
