# Supplementary material for: Regulation of human glioma cell migration, tumor growth, and stemness gene expression using a Lck targeted inhibitor
Source: PubMed Central journal article supplement (PMC6462869; doi:10.1038/s41388-018-0546-z), 2018-10-23
Supplement: 41388_2018_546_MOESM4_ESM.pdf [file 41388_2018_546_MOESM4_ESM.pdf]

Cosmic ID      Nucleotide mutation      Amino acid substitution

**Neural**

none

**Proneural**

|      |       |          |         |
|------|-------|----------|---------|
| IDH1 | 28748 | c.394C>A | p.R132S |
| IDH1 | 28747 | c.394C>T | p.R132C |
| IDH2 | 34039 | c.514A>T | p.R172W |
| NRAS | 564   | c.35G>A  | p.G12D  |

**Mesenchymal**

|      |       |           |         |
|------|-------|-----------|---------|
| EGFR | 21687 | c.866C>T  | p.A289V |
| IDH1 | 28748 | c.394C>A  | p.R132S |
| IDH1 | 28747 | c.394C>T  | p.R132C |
| NF2  | 23667 | c.1396C>T | p.R466* |
| NRAS | 564   | c.35G>A   | p.G12D  |
